# Supplementary figures and images for: Racial Disparities in Psychiatric Decisional Capacity Consultations
Source: Atypon-hosted journal article supplement (doi:10.1176/appi.ps.202100685), 2022-08-25

# Black

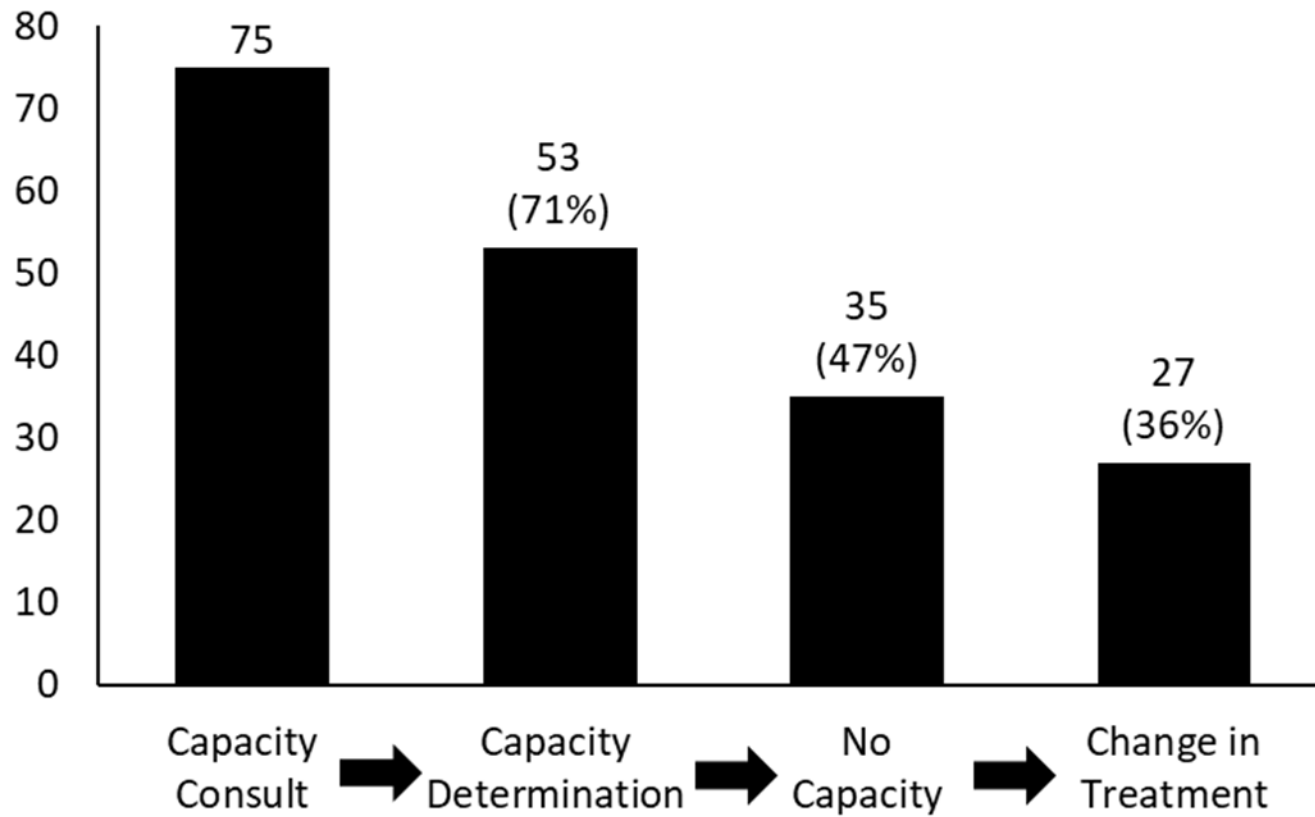

# White

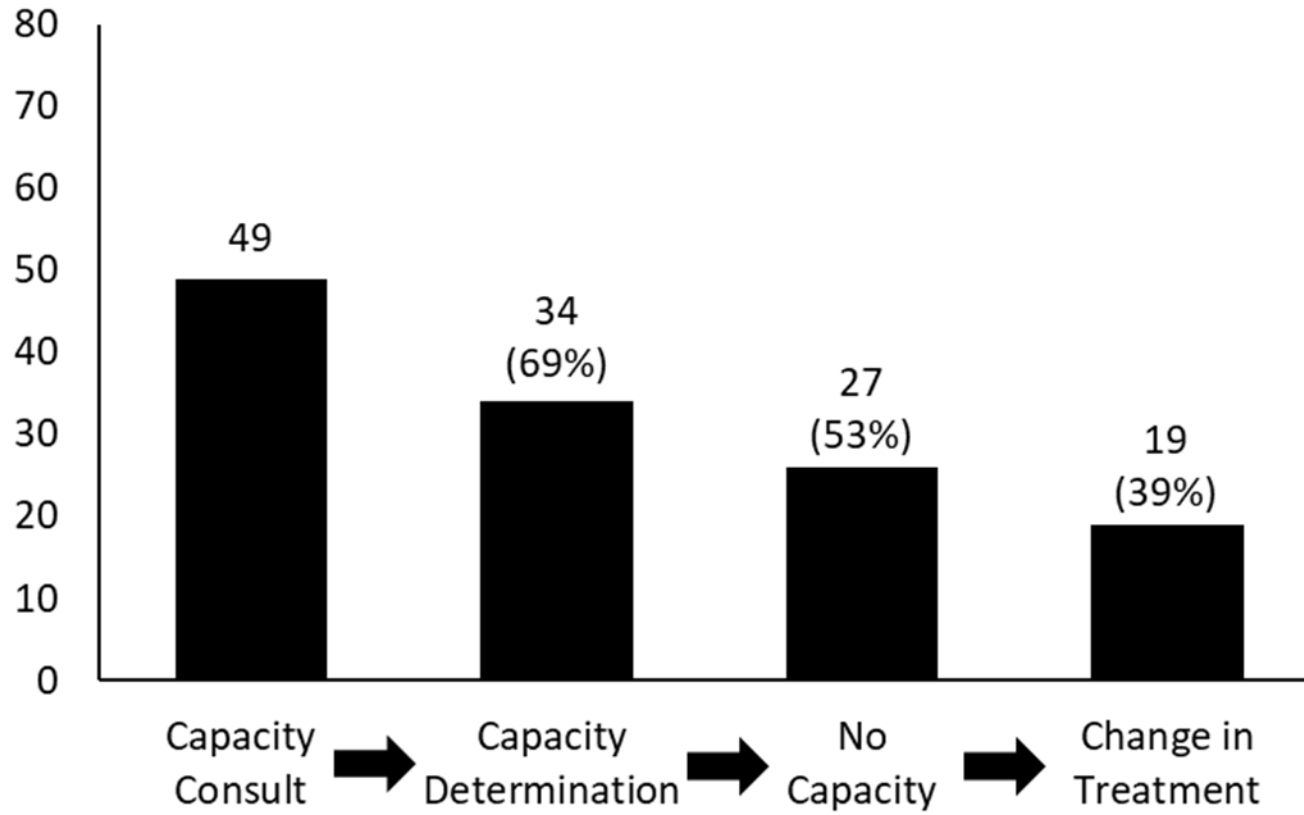

# Hispanic

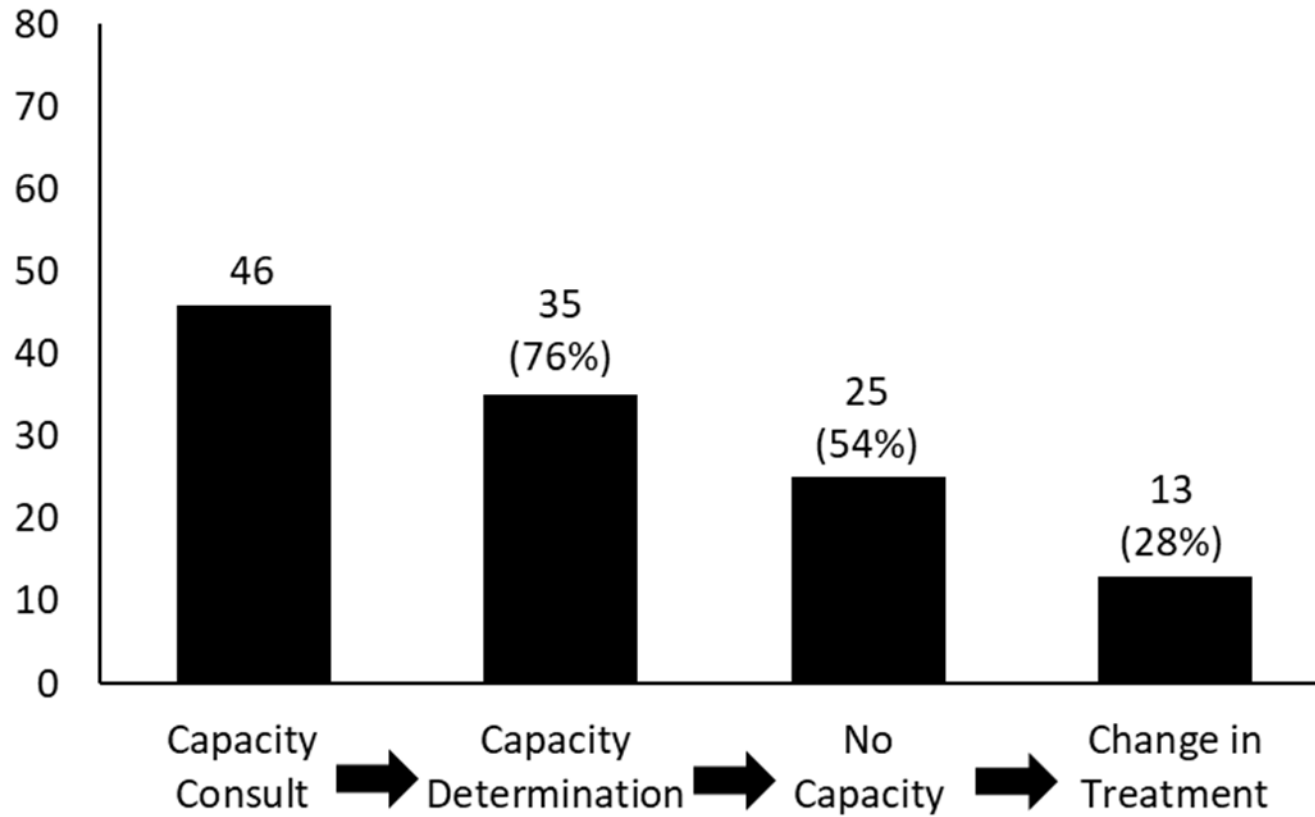

# Asian

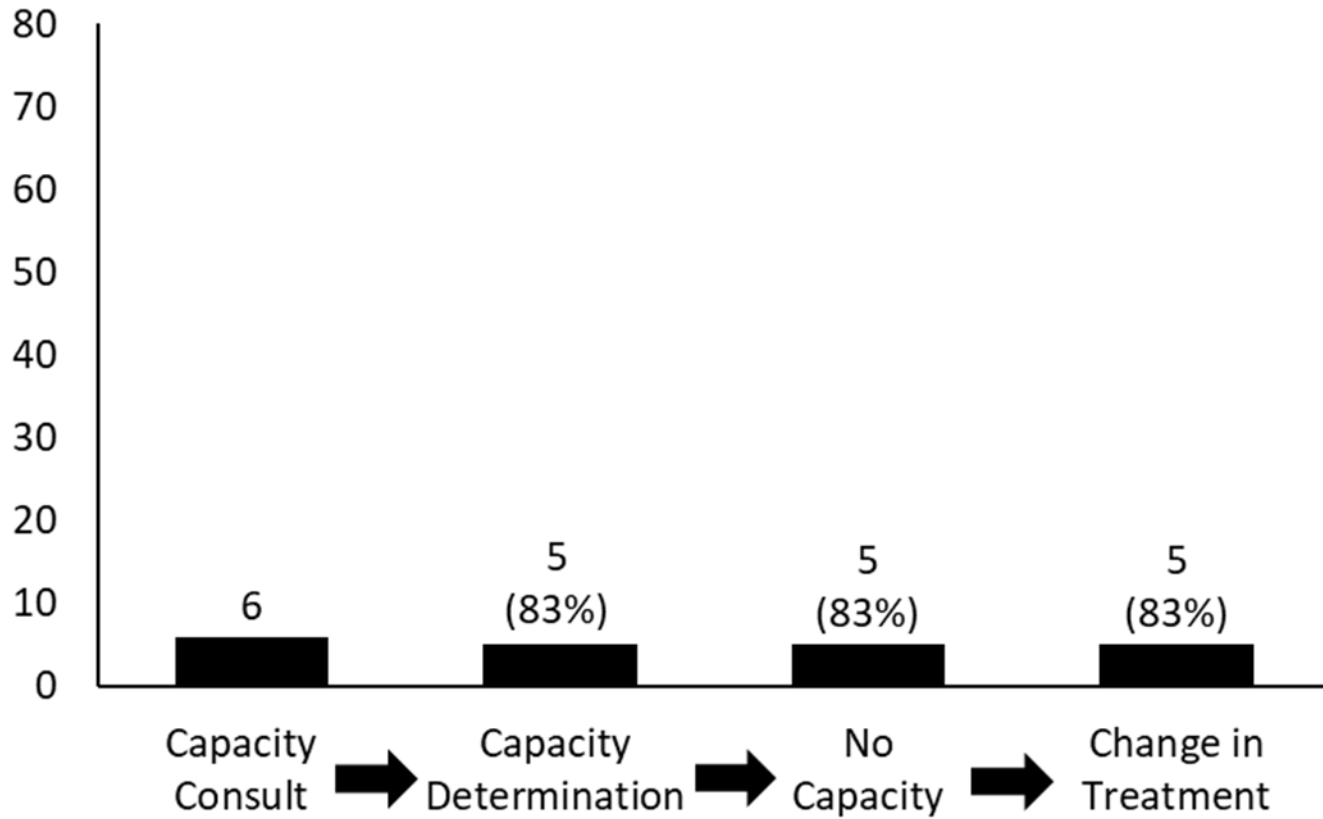

Supplement: appi.ps.202100685.ds001.pdf [file appi.ps.202100685.ds001.pdf]
